# Supplementary material
Source: PubMed Central journal article supplement (PMC3464188)
Supplement: NIHMS409110-supplement-supp.pdf [file NIHMS409110-supplement-supp.pdf]

## Supplementary Information for Mathieu *et al.*, "Six-Helix Bundles Designed from DNA"

Sequences for the Six-Helix Bundles Used to Generate 2D arrays.

### Tile - 1

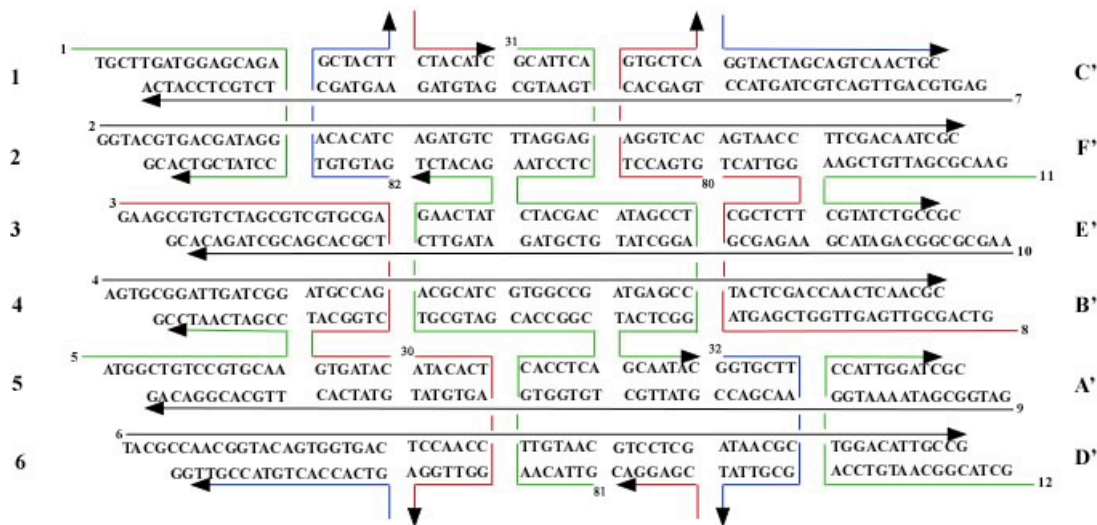

### Tile - 2

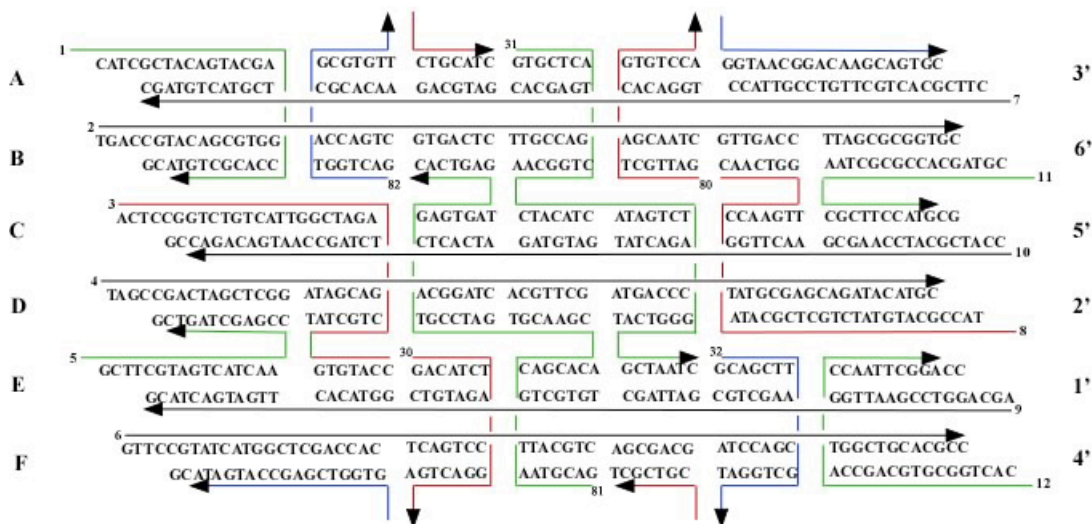

Blunted Ends for Set #1: 1, 2, 1', 2', A, B, A', & B'.

Blunted Ends for Set #2: 3, 4, 3', 4', C, D, C', & D'.

Blunted Ends for Set #3: 5, 6, 5', 6', E, F, E', & F'.
